# Supplementary material
Source: Springer Nature journal article supplement (https://www.springermedizin.de/resource/supplementary/12936_2008_707_MOESM3_ESM.pdf/9548050)
Supplement: MOESM3 [file 9548050]

**Suspected malaria**  
88

**Slide requested**  
87

**Clinic slide +**  
**57.5% (50/87)**  
RDT+ 4.0%  
(2/50)

**Clinic slide -**  
**42.5% (37/87)**  
RDT+ 0.0%  
(0/37)

**Malaria treatment**  
**100.0%**  
**(50/50)**

**No malaria treatment**  
**0.0% (0/0)**

**Malaria treatment**  
**59.5%**  
**(22/37)**

**No malaria treatment**  
**40.5%**  
**(15/37)**

Research slide +  
0.0% (0/50)  
RDT+  
4.0% (2/50)

Research slide +  
0.0% (0/0)  
RDT+  
0.0% (0/0)

Research slide +:  
0.0% (0/22)  
RDT +  
0.0% (0/22)

Research slide +  
0.0% (0/15)  
RDT +  
0.0% (0/15)
